# Supplementary material
Source: publisher figshare collection journal article supplement (https://acs.figshare.com/ndownloader/files/4084300)
Supplement: Supplementary file 1 [file 4084300]

 
data_C13H22O2 
 
_audit_creation_method            SHELXL-97 
_chemical_name_systematic 
; 
 ? 
; 
_chemical_name_common             ? 
_chemical_melting_point           ? 
_chemical_formula_moiety          'C13 H22 O2' 
_chemical_formula_sum 
 'C13 H22 O2' 
_chemical_formula_weight          210.31 
 
loop_ 
 _atom_type_symbol 
 _atom_type_description 
 _atom_type_scat_dispersion_real 
 _atom_type_scat_dispersion_imag 
 _atom_type_scat_source 
 'C'  'C'   0.0181   0.0091 
 'International Tables Vol C Tables 4.2.6.8 and 6.1.1.4' 
 'H'  'H'   0.0000   0.0000 
 'International Tables Vol C Tables 4.2.6.8 and 6.1.1.4' 
 'O'  'O'   0.0492   0.0322 
 'International Tables Vol C Tables 4.2.6.8 and 6.1.1.4' 
 
_symmetry_cell_setting           'Monoclinic'
_symmetry_space_group_name_H-M   'P 21'
 
loop_ 
 _symmetry_equiv_pos_as_xyz 
 'x, y, z' 
 '-x, y+1/2, -z' 
 
_cell_length_a                    7.9329(3) 
_cell_length_b                    7.1935(3) 
_cell_length_c                    10.3786(4) 
_cell_angle_alpha                 90.00 
_cell_angle_beta                  90.3910(10) 
_cell_angle_gamma                 90.00 
_cell_volume                      592.24(4) 
_cell_formula_units_Z             2 
_cell_measurement_temperature     100(2) 
_cell_measurement_reflns_used     5139
_cell_measurement_theta_min       7.00
_cell_measurement_theta_max       67.52
 
_exptl_crystal_description        block 
_exptl_crystal_colour             colorless 
_exptl_crystal_size_max           0.16 
_exptl_crystal_size_mid           0.10 
_exptl_crystal_size_min           0.06 
_exptl_crystal_density_meas       'not measured'  
_exptl_crystal_density_diffrn     1.179 
_exptl_crystal_density_method     none 
_exptl_crystal_F_000              232 
_exptl_absorpt_coefficient_mu     0.605 
_exptl_absorpt_correction_type    'multi-scan' 
_exptl_absorpt_correction_T_min   0.9094 
_exptl_absorpt_correction_T_max   0.9646 
_exptl_absorpt_process_details    
;
Sheldrick, G.M. (2008). SADABS v2008/1. Bruker AXS Inc. Madison, WI USA.
; 
 
_exptl_special_details 
; 
 ? 
; 
 
_diffrn_ambient_temperature       100(2) 
_diffrn_radiation_wavelength      1.54178 
_diffrn_radiation_type            CuK\a 
_diffrn_source                    'microfocus sealed tube'
_diffrn_source_type               'Incoatec I\uS'
_diffrn_radiation_monochromator   graphite 
_diffrn_measurement_device_type   'Bruker Kappa DUO CCD diffractometer'
_diffrn_measurement_method        '\f and \w scans'  
_diffrn_detector_area_resol_mean  ? 
_diffrn_reflns_number             5618 
_diffrn_reflns_av_R_equivalents   0.0261 
_diffrn_reflns_av_sigmaI/netI     0.0301 
_diffrn_reflns_limit_h_min        -9 
_diffrn_reflns_limit_h_max        8 
_diffrn_reflns_limit_k_min        -8 
_diffrn_reflns_limit_k_max        8 
_diffrn_reflns_limit_l_min        -12 
_diffrn_reflns_limit_l_max        12 
_diffrn_reflns_theta_min          4.26 
_diffrn_reflns_theta_max          67.51 
_reflns_number_total              2067 
_reflns_number_gt                 2042 
_reflns_threshold_expression      >2sigma(I) 
 
_computing_data_collection       'APEX2 (Bruker, 2010)'
_computing_cell_refinement       'SAINT (Bruker, 2010)'
_computing_data_reduction        'SAINT (Bruker, 2010)'
_computing_structure_solution    'SHELXS-97 (Sheldrick, 2008)'
_computing_structure_refinement  'SHELXL-97 (Sheldrick, 2008)'
_computing_molecular_graphics    'Bruker SHELXTL'
_computing_publication_material  'Bruker SHELXTL' 
 
_refine_special_details 
; 
 Refinement of F^2^ against ALL reflections.  The weighted R-factor wR and 
 goodness of fit S are based on F^2^, conventional R-factors R are based 
 on F, with F set to zero for negative F^2^. The threshold expression of 
 F^2^ > 2sigma(F^2^) is used only for calculating R-factors(gt) etc. and is 
 not relevant to the choice of reflections for refinement.  R-factors based 
 on F^2^ are statistically about twice as large as those based on F, and R- 
 factors based on ALL data will be even larger. 
; 
 
_refine_ls_structure_factor_coef  Fsqd  
_refine_ls_matrix_type            full 
_refine_ls_weighting_scheme       calc  
_refine_ls_weighting_details 
 'calc w=1/[\s^2^(Fo^2^)+(0.0451P)^2^+0.0907P] where P=(Fo^2^+2Fc^2^)/3' 
_atom_sites_solution_primary      direct 
_atom_sites_solution_secondary    difmap 
_atom_sites_solution_hydrogens    difmap
_refine_ls_hydrogen_treatment     mixed 
_refine_ls_extinction_method      none 
_refine_ls_extinction_coef        na
_chemical_absolute_configuration  ad
_refine_ls_abs_structure_details 
 'Flack H D (1983), Acta Cryst. A39, 876-881' 
_refine_ls_abs_structure_Flack    0.18(18) 
_refine_ls_number_reflns          2067 
_refine_ls_number_parameters      142 
_refine_ls_number_restraints      3 
_refine_ls_R_factor_all           0.0299 
_refine_ls_R_factor_gt            0.0296 
_refine_ls_wR_factor_ref          0.0793 
_refine_ls_wR_factor_gt           0.0792 
_refine_ls_goodness_of_fit_ref    1.048 
_refine_ls_restrained_S_all       1.049 
_refine_ls_shift/su_max           0.000 
_refine_ls_shift/su_mean          0.000 
 
loop_ 
 _atom_site_label 
 _atom_site_type_symbol 
 _atom_site_fract_x 
 _atom_site_fract_y 
 _atom_site_fract_z 
 _atom_site_U_iso_or_equiv 
 _atom_site_adp_type 
 _atom_site_occupancy 
 _atom_site_symmetry_multiplicity 
 _atom_site_calc_flag 
 _atom_site_refinement_flags 
 _atom_site_disorder_assembly 
 _atom_site_disorder_group 
O1 O 0.52288(13) 0.49492(14) 0.36381(9) 0.0270(2) Uani 1 1 d D . . 
H1O H 0.512(2) 0.385(2) 0.3568(19) 0.040 Uiso 1 1 d D . . 
O2 O 0.46856(12) 1.12581(13) 0.38849(9) 0.0257(2) Uani 1 1 d D . . 
H2O H 0.467(2) 1.088(3) 0.4619(14) 0.039 Uiso 1 1 d D . . 
C1 C 0.52383(15) 0.57662(17) 0.23767(12) 0.0187(3) Uani 1 1 d . . . 
H1 H 0.5343 0.4754 0.1722 0.022 Uiso 1 1 calc R . . 
C2 C 0.35741(16) 0.67902(19) 0.21528(12) 0.0219(3) Uani 1 1 d . . . 
H2A H 0.2626 0.5920 0.2291 0.026 Uiso 1 1 calc R . . 
H2B H 0.3518 0.7225 0.1249 0.026 Uiso 1 1 calc R . . 
C3 C 0.33878(16) 0.84558(18) 0.30564(13) 0.0235(3) Uani 1 1 d . . . 
H3A H 0.2364 0.9164 0.2812 0.028 Uiso 1 1 calc R . . 
H3B H 0.3241 0.8003 0.3949 0.028 Uiso 1 1 calc R . . 
C4 C 0.49095(16) 0.97423(17) 0.30096(12) 0.0195(3) Uani 1 1 d . . . 
H4 H 0.4973 1.0269 0.2120 0.023 Uiso 1 1 calc R . . 
C5 C 0.65614(16) 0.86758(17) 0.32734(12) 0.0185(3) Uani 1 1 d . . . 
H5 H 0.6452 0.8082 0.4140 0.022 Uiso 1 1 calc R . . 
C6 C 0.67866(15) 0.70716(16) 0.22712(12) 0.0166(3) Uani 1 1 d . . . 
C7 C 0.80372(16) 0.99885(19) 0.33477(12) 0.0247(3) Uani 1 1 d . . . 
H7A H 0.8354 1.0615 0.2581 0.030 Uiso 1 1 calc R . . 
C8 C 0.89211(18) 1.0330(2) 0.44014(15) 0.0321(3) Uani 1 1 d . . . 
H8A H 0.8641 0.9729 0.5186 0.038 Uiso 1 1 calc R . . 
H8C H 0.9839 1.1178 0.4376 0.038 Uiso 1 1 calc R . . 
C9 C 0.69449(15) 0.78593(17) 0.08891(11) 0.0179(3) Uani 1 1 d . . . 
H9A H 0.5863 0.8450 0.0642 0.021 Uiso 1 1 calc R . . 
H9B H 0.7822 0.8839 0.0890 0.021 Uiso 1 1 calc R . . 
C10 C 0.73931(16) 0.64047(18) -0.01236(12) 0.0219(3) Uani 1 1 d . . . 
H10A H 0.6447 0.5517 -0.0217 0.026 Uiso 1 1 calc R . . 
H10C H 0.7555 0.7026 -0.0965 0.026 Uiso 1 1 calc R . . 
C11 C 0.89913(17) 0.5343(2) 0.02364(14) 0.0267(3) Uani 1 1 d . . . 
H11A H 0.9188 0.4344 -0.0401 0.032 Uiso 1 1 calc R . . 
H11B H 0.9969 0.6197 0.0217 0.032 Uiso 1 1 calc R . . 
C12 C 0.88354(16) 0.44979(18) 0.15751(14) 0.0259(3) Uani 1 1 d . . . 
H12A H 0.9910 0.3884 0.1814 0.031 Uiso 1 1 calc R . . 
H12B H 0.7940 0.3539 0.1565 0.031 Uiso 1 1 calc R . . 
C13 C 0.84125(16) 0.59799(18) 0.25832(13) 0.0232(3) Uani 1 1 d . . . 
H13A H 0.9365 0.6865 0.2649 0.028 Uiso 1 1 calc R . . 
H13B H 0.8288 0.5371 0.3433 0.028 Uiso 1 1 calc R . . 
 
loop_ 
 _atom_site_aniso_label 
 _atom_site_aniso_U_11 
 _atom_site_aniso_U_22 
 _atom_site_aniso_U_33 
 _atom_site_aniso_U_23 
 _atom_site_aniso_U_13 
 _atom_site_aniso_U_12 
O1 0.0439(6) 0.0164(5) 0.0206(4) 0.0025(4) 0.0038(4) -0.0056(4) 
O2 0.0404(5) 0.0160(5) 0.0207(4) -0.0023(4) 0.0028(4) 0.0035(4) 
C1 0.0227(6) 0.0153(6) 0.0182(6) -0.0005(5) 0.0019(4) -0.0029(5) 
C2 0.0177(6) 0.0225(7) 0.0253(6) -0.0033(5) 0.0024(5) -0.0040(5) 
C3 0.0212(6) 0.0229(7) 0.0265(7) -0.0012(5) 0.0042(5) 0.0017(5) 
C4 0.0268(6) 0.0142(6) 0.0175(6) -0.0016(5) 0.0016(5) 0.0019(5) 
C5 0.0238(6) 0.0140(6) 0.0178(6) 0.0003(5) -0.0013(4) -0.0019(5) 
C6 0.0180(6) 0.0132(6) 0.0185(6) -0.0007(5) -0.0011(4) -0.0003(5) 
C7 0.0284(7) 0.0182(6) 0.0275(6) -0.0006(5) 0.0008(5) -0.0048(6) 
C8 0.0296(7) 0.0284(8) 0.0381(7) -0.0072(6) -0.0059(6) -0.0053(6) 
C9 0.0171(6) 0.0163(6) 0.0203(6) 0.0004(5) 0.0017(4) -0.0004(4) 
C10 0.0238(6) 0.0204(6) 0.0215(6) -0.0011(5) 0.0044(5) -0.0030(5) 
C11 0.0219(6) 0.0208(7) 0.0375(7) -0.0068(6) 0.0069(5) 0.0001(5) 
C12 0.0220(6) 0.0172(6) 0.0384(7) -0.0037(5) -0.0021(5) 0.0043(5) 
C13 0.0223(6) 0.0190(7) 0.0283(6) -0.0008(5) -0.0059(5) 0.0017(5) 
 
_geom_special_details 
; 
 All esds (except the esd in the dihedral angle between two l.s. planes) 
 are estimated using the full covariance matrix.  The cell esds are taken 
 into account individually in the estimation of esds in distances, angles 
 and torsion angles; correlations between esds in cell parameters are only 
 used when they are defined by crystal symmetry.  An approximate (isotropic) 
 treatment of cell esds is used for estimating esds involving l.s. planes. 
; 
 
loop_ 
 _geom_bond_atom_site_label_1 
 _geom_bond_atom_site_label_2 
 _geom_bond_distance 
 _geom_bond_site_symmetry_2 
 _geom_bond_publ_flag 
O1 C1 1.4351(15) . ? 
O1 H1O 0.796(16) . ? 
O2 C4 1.4311(15) . ? 
O2 H2O 0.809(14) . ? 
C1 C2 1.5282(17) . ? 
C1 C6 1.5505(15) . ? 
C1 H1 1.0000 . ? 
C2 C3 1.5293(18) . ? 
C2 H2A 0.9900 . ? 
C2 H2B 0.9900 . ? 
C3 C4 1.5221(17) . ? 
C3 H3A 0.9900 . ? 
C3 H3B 0.9900 . ? 
C4 C5 1.5414(17) . ? 
C4 H4 1.0000 . ? 
C5 C7 1.5056(17) . ? 
C5 C6 1.5646(16) . ? 
C5 H5 1.0000 . ? 
C6 C13 1.5426(16) . ? 
C6 C9 1.5482(16) . ? 
C7 C8 1.318(2) . ? 
C7 H7A 0.9500 . ? 
C8 H8A 0.9500 . ? 
C8 H8C 0.9500 . ? 
C9 C10 1.5267(17) . ? 
C9 H9A 0.9900 . ? 
C9 H9B 0.9900 . ? 
C10 C11 1.5245(18) . ? 
C10 H10A 0.9900 . ? 
C10 H10C 0.9900 . ? 
C11 C12 1.522(2) . ? 
C11 H11A 0.9900 . ? 
C11 H11B 0.9900 . ? 
C12 C13 1.5325(18) . ? 
C12 H12A 0.9900 . ? 
C12 H12B 0.9900 . ? 
C13 H13A 0.9900 . ? 
C13 H13B 0.9900 . ? 
 
loop_ 
 _geom_angle_atom_site_label_1 
 _geom_angle_atom_site_label_2 
 _geom_angle_atom_site_label_3 
 _geom_angle 
 _geom_angle_site_symmetry_1 
 _geom_angle_site_symmetry_3 
 _geom_angle_publ_flag 
C1 O1 H1O 108.9(14) . . ? 
C4 O2 H2O 110.0(14) . . ? 
O1 C1 C2 109.04(10) . . ? 
O1 C1 C6 108.76(9) . . ? 
C2 C1 C6 112.41(10) . . ? 
O1 C1 H1 108.9 . . ? 
C2 C1 H1 108.9 . . ? 
C6 C1 H1 108.9 . . ? 
C1 C2 C3 111.80(10) . . ? 
C1 C2 H2A 109.3 . . ? 
C3 C2 H2A 109.3 . . ? 
C1 C2 H2B 109.3 . . ? 
C3 C2 H2B 109.3 . . ? 
H2A C2 H2B 107.9 . . ? 
C4 C3 C2 112.14(10) . . ? 
C4 C3 H3A 109.2 . . ? 
C2 C3 H3A 109.2 . . ? 
C4 C3 H3B 109.2 . . ? 
C2 C3 H3B 109.2 . . ? 
H3A C3 H3B 107.9 . . ? 
O2 C4 C3 109.95(10) . . ? 
O2 C4 C5 112.06(10) . . ? 
C3 C4 C5 111.42(10) . . ? 
O2 C4 H4 107.7 . . ? 
C3 C4 H4 107.7 . . ? 
C5 C4 H4 107.7 . . ? 
C7 C5 C4 110.90(10) . . ? 
C7 C5 C6 113.85(10) . . ? 
C4 C5 C6 110.48(10) . . ? 
C7 C5 H5 107.1 . . ? 
C4 C5 H5 107.1 . . ? 
C6 C5 H5 107.1 . . ? 
C13 C6 C9 107.93(9) . . ? 
C13 C6 C1 109.78(10) . . ? 
C9 C6 C1 110.88(9) . . ? 
C13 C6 C5 109.57(9) . . ? 
C9 C6 C5 110.87(10) . . ? 
C1 C6 C5 107.79(9) . . ? 
C8 C7 C5 124.65(13) . . ? 
C8 C7 H7A 117.7 . . ? 
C5 C7 H7A 117.7 . . ? 
C7 C8 H8A 120.0 . . ? 
C7 C8 H8C 120.0 . . ? 
H8A C8 H8C 120.0 . . ? 
C10 C9 C6 114.06(10) . . ? 
C10 C9 H9A 108.7 . . ? 
C6 C9 H9A 108.7 . . ? 
C10 C9 H9B 108.7 . . ? 
C6 C9 H9B 108.7 . . ? 
H9A C9 H9B 107.6 . . ? 
C11 C10 C9 111.84(10) . . ? 
C11 C10 H10A 109.2 . . ? 
C9 C10 H10A 109.2 . . ? 
C11 C10 H10C 109.2 . . ? 
C9 C10 H10C 109.2 . . ? 
H10A C10 H10C 107.9 . . ? 
C12 C11 C10 110.55(10) . . ? 
C12 C11 H11A 109.5 . . ? 
C10 C11 H11A 109.5 . . ? 
C12 C11 H11B 109.5 . . ? 
C10 C11 H11B 109.5 . . ? 
H11A C11 H11B 108.1 . . ? 
C11 C12 C13 111.41(11) . . ? 
C11 C12 H12A 109.3 . . ? 
C13 C12 H12A 109.3 . . ? 
C11 C12 H12B 109.3 . . ? 
C13 C12 H12B 109.3 . . ? 
H12A C12 H12B 108.0 . . ? 
C12 C13 C6 113.41(10) . . ? 
C12 C13 H13A 108.9 . . ? 
C6 C13 H13A 108.9 . . ? 
C12 C13 H13B 108.9 . . ? 
C6 C13 H13B 108.9 . . ? 
H13A C13 H13B 107.7 . . ? 
 
loop_ 
 _geom_torsion_atom_site_label_1 
 _geom_torsion_atom_site_label_2 
 _geom_torsion_atom_site_label_3 
 _geom_torsion_atom_site_label_4 
 _geom_torsion 
 _geom_torsion_site_symmetry_1 
 _geom_torsion_site_symmetry_2 
 _geom_torsion_site_symmetry_3 
 _geom_torsion_site_symmetry_4 
 _geom_torsion_publ_flag 
O1 C1 C2 C3 65.73(13) . . . . ? 
C6 C1 C2 C3 -54.96(13) . . . . ? 
C1 C2 C3 C4 52.25(14) . . . . ? 
C2 C3 C4 O2 -179.07(10) . . . . ? 
C2 C3 C4 C5 -54.21(14) . . . . ? 
O2 C4 C5 C7 -51.03(14) . . . . ? 
C3 C4 C5 C7 -174.69(10) . . . . ? 
O2 C4 C5 C6 -178.23(10) . . . . ? 
C3 C4 C5 C6 58.10(13) . . . . ? 
O1 C1 C6 C13 55.92(12) . . . . ? 
C2 C1 C6 C13 176.77(10) . . . . ? 
O1 C1 C6 C9 175.09(10) . . . . ? 
C2 C1 C6 C9 -64.06(13) . . . . ? 
O1 C1 C6 C5 -63.38(12) . . . . ? 
C2 C1 C6 C5 57.47(12) . . . . ? 
C7 C5 C6 C13 56.50(13) . . . . ? 
C4 C5 C6 C13 -177.95(10) . . . . ? 
C7 C5 C6 C9 -62.54(13) . . . . ? 
C4 C5 C6 C9 63.02(12) . . . . ? 
C7 C5 C6 C1 175.92(10) . . . . ? 
C4 C5 C6 C1 -58.52(12) . . . . ? 
C4 C5 C7 C8 112.86(15) . . . . ? 
C6 C5 C7 C8 -121.81(15) . . . . ? 
C13 C6 C9 C10 52.55(13) . . . . ? 
C1 C6 C9 C10 -67.72(12) . . . . ? 
C5 C6 C9 C10 172.57(10) . . . . ? 
C6 C9 C10 C11 -54.72(14) . . . . ? 
C9 C10 C11 C12 54.39(14) . . . . ? 
C10 C11 C12 C13 -55.40(14) . . . . ? 
C11 C12 C13 C6 56.87(14) . . . . ? 
C9 C6 C13 C12 -53.46(13) . . . . ? 
C1 C6 C13 C12 67.51(13) . . . . ? 
C5 C6 C13 C12 -174.29(10) . . . . ? 
 
loop_ 
 _geom_hbond_atom_site_label_D 
 _geom_hbond_atom_site_label_H 
 _geom_hbond_atom_site_label_A 
 _geom_hbond_distance_DH 
 _geom_hbond_distance_HA 
 _geom_hbond_distance_DA 
 _geom_hbond_angle_DHA 
 _geom_hbond_site_symmetry_A 
O1 H1O O2  0.796(16) 1.928(16) 2.7024(14) 164(2) 1_545 
O2 H2O O1  0.809(14) 1.930(15) 2.7381(14) 176.9(19) 2_656 
 
_diffrn_measured_fraction_theta_max    0.987 
_diffrn_reflns_theta_full              67.51 
_diffrn_measured_fraction_theta_full   0.987 
_refine_diff_density_max    0.191 
_refine_diff_density_min   -0.156 
_refine_diff_density_rms    0.032 
